# Supplementary material
Source: Research Square preprint supplement (doi:10.21203/rs.3.rs-9836801/v1)
Supplement: Supplementary file 1 [file 4d66b5ecb600d82e0a5046ab.docx]

**Household questionnaire**

1. **Individual household interview questionnaire**

Dear informant, you are selected as an interviewee for data collection as part of my PhD. fieldwork, which is the major part of the research project named “**Human Large Carnivore Conflict in Omo national park**”. Please note that relevance of the conclusions depends on the quality of data you provide. The data collected will be consumed only for answering scientific research questions about your answers will be used exclusively for my PhD research and will not be disclosed to any other third party who may be interested in the data for other purposes. Hence, I kindly request you to genuinely cooperate in answering my questions related to institutions and wildlife conservation, management and use practices in this area.

Date (dd/mm/yy) __________________

Interviewer_________________

Name of Village __________________

Sub village ____________________

Household Code __________________

GPS N/S __________________

1. **Basic information**
2. Name of interviewee: ________________________
3. Sex: Male =1; Female = 2
4. Age (estimated): ________
5. Marital status: Married =1; Single =2; Separated =3; Divorced =4
6. Household head level of education: > Grade 12 =1; Grade 9-12 = 2; Grade 5-8 = 3; Grade 1-4 = 4; No formal education = 5
7. Size of farmland holding in hectares: ____________
8. Distance to the National Park: ________
9. Main occupation: Agriculturalist = 1; pastoralist = 2; Agro-pastoralist = 3; Government employee = 4; Other =5 (please specify) ____________________
10. Additional responsibility in the community: ________________________________
11. Length of time you have lived in this area (Settlement year/ migration history):

Since birth =1; more than 10 years =2; 10 years =3; less than 5 years =4.

1. Religion:

Cultural belief = 1; Protestant =2; Orthodox = 3; Muslim = 4; Other = 5 (please specify) __________________________

1. Ethnic group:

Boddy= 1; Mursi= 2; Dizzy= 3; Surma= 4; Yangatom= 5; other please = 6 specify_________________________________

1. **Household characteristics**
   - - 1. Number of persons living together: Total number _________; Number of children ________; Number of female ________; Number of male________; Other persons living together (Please specify) __________________________
       2. Types of domestic animals:

| **No.** | **Type of animal** | **Number of Animals** | | | | |
| --- | --- | --- | --- | --- | --- | --- |
| 2019 | 2020 | 2021 | 2022 | 2023 |
| 1 | Cattle |  |  |  |  |  |
| 2 | Shoat |  |  |  |  |  |
| 3 | Equine |  |  |  |  |  |
| 4 | Poultry |  |  |  |  |  |

- - - 1. Major crops produced over years and their quantities:

| No. | Type of crop/fruit | Quantity per year (in quintals) | | | | |
| --- | --- | --- | --- | --- | --- | --- |
| 2018 | 2019 | 2020 | 2021 | 2022 |
| 1 | Maize |  |  |  |  |  |
| 2 | Coffee |  |  |  |  |  |
| 3 | Banana |  |  |  |  |  |
|  |  |  |  |  |  |  |

1. Reason(s) for the increase/decrease in the crop/fruit yield: ______________________________________________________________________________________________________________________________________________________
2. **Income sources**

What is the major source of the income? _______________________________

|  |  | Type of crop | Unit of measurement | Quantity sold in 2020 (in quintals) | Income |
| --- | --- | --- | --- | --- | --- |
| Agricultural crops |  |  |  |  |  |
|  |  |  |  |  |
|  |  |  |  |  |
|  |  |  |  |  |
|  |  |  |  |  |
|  |  |  |  |  |
|  |  |  |  |  |
| Domestic animals and animal products |  |  |  |  |  |
|  |  |  |  |  |
|  |  |  |  |  |
|  |  |  |  |  |
|  |  |  |  |  |
|  |  |  |  |  |
| Other income sources |  |  |  |  |  |
|  |  |  |  |  |
|  |  |  |  |  |
|  |  |  |  |  |

*Self-classification of HH: Poor= 1; medium= 2; rich= 3*

1. **How do different discourses and resource utilization practices result in enactment of multiple versions of Human-wildlife conflict in Omo national park?**

**Pastoralist and agro-pastoralist about grazing land**

1. Where is the location of your main grazing land area? ___________________________________________________________________________

2. How long (estimated in hours) do you have to travel with the livestock to access the grazing land area? ______________________________________________________

________________________

3. Do you always have equal access to the grazing land?

Yes =1; No =2. Give reasons. ___________________________________________________

_____________________________________________________________

- - - 1. If your answer to Q3 is no, how do you manage to get access to sufficient grass for your livestock? ____________________________________________________

__________________________________________________________

5. Do you think that the park administration is now effective in protecting the park land area from grazing?

Yes =1; No =2.

6. If your answer to Q5 is no, why do you think that it is ineffective? ___________________

_________________________________________________________

7. Other than the park, is there a limit of the area beyond which you are not allowed to graze your cattle?

Yes =1; No =2. Give reasons. __________________________________________________

________________________________________________________________________

8. When was the worst time in getting access to grass for your livestock? ___________________________________________________________________________

9. If the worst situation happened as Q8, what were the consequences? _________________

_____________________________________________________________

10. If the worst case happened as Q8, how did you manage to pass through the problem? ___

_____________________________________________________________________

1. What is the trend in the status of grazing through time (Please indicate the time range you are referring to)?

Expanding =1; Shrinking =2; Same. Please explain how it has happened. ________________

____________________________________________________________

1. Do you have grazing reserve in your area?

Yes= 1; No= 2

1. If your answer to Q12 is yes, where do you have the grazing reserve? ___________
2. When do you use the grazing reserve? _______________
3. How do you effectively control entrance of grazing animals to your grazing reserve? ____________
4. What is the situation of the grass types preferable for animal grazing through time (Please indicate the time range you are referring to)?

Increasing =1; Decreasing =2; Same. Please give reasons for your answer. ____________

1. How is the trend of milk yield over time (Please indicate the time range you are referring to)? Increasing =1; Decreasing =2; Same. Please give reasons for your answer.

__________________________________________________________________

1. What is the situation of animal fattening over time (Please indicate the time range you are referring to)? Increasing =1; Decreasing =2; Same. Please give reasons for your answer. ______________________________________________________________

___________________________________________________

**Water resources**

1. Where do the people and livestock get access to water?
2. If you use more than one source of water, please give reasons. ______________________________________________________________________________________________________________________________________________________
3. Depending on your answer to Q20, please specify if there are differences in terms of months about the time in which you use each of the sources of water for livestock in the following table.

| **No.** | **Source of water** | **Months of use** |
| --- | --- | --- |
|  |  |  |
|  |  |  |
|  |  |  |
|  |  |  |
|  |  |  |

1. Is there a problem in accessing the different sources of water at the time you want?

Yes =1; No =2.

1. If your answer to Q22 is yes, what is the problem? ____________________________________________________________________________________________________________________________________________________________
2. If your answer to Q22 is yes, what is your experience to deal with the problem to successfully access the water? _________________________________________________________________________________________________________________________________________________________________________________________________________________________________
3. What future plans do you have regarding livestock production? ______________________________________________________________________________________________________________________________________________________

**Large carnivores**

1. Can you sort these animals that are a big problem, small problem, no problem or useful to you, and explain why? *(show picture cards):*

|  | Identification | | Do you know the animal? | Does species occur here? (1 days walk?) | Problem? | | | | | Why is it a problem? |
| --- | --- | --- | --- | --- | --- | --- | --- | --- | --- | --- |
| Right Y/N | Species confused with | Big | Small |  | No problem | Useful |
| Jackal |  |  |  |  |  |  |  |  |  |  |
| Lion |  |  |  |  |  |  |  |  |  |  |
| Leopard |  |  |  |  |  |  |  |  |  |  |
| Cheetah |  |  |  |  |  |  |  |  |  |  |
| African wild dog |  |  |  |  |  |  |  |  |  |  |
| Spotted hyena |  |  |  |  |  |  |  |  |  |  |
| Striped hyena |  |  |  |  |  |  |  |  |  |  |
|  |  |  |  |  |  |  |  |  |  |  |
|  |  |  |  |  |  |  |  |  |  |  |

1. Mention major wild animals which you think are symbolic to the National Park? ______________________________________________________________________________________________________________________________________________
2. Which species from the park is the biggest nuisance to you and why?____________

________________________________________________________________

1. How often do you personally see large carnivore?

|  | Rarely | Monthly | Weekly |  | Rarely | Monthly | Weekly |
| --- | --- | --- | --- | --- | --- | --- | --- |
| Lion |  |  |  | Cheetah |  |  |  |
| Spotted Hyena |  |  |  | Wild dog |  |  |  |
| Leopard |  |  |  | Jackal |  |  |  |
| Striped Hyaena |  |  |  |  |  |  |  |

1. What uses does large carnivore have in your area?

Environmental= 1; Economic= 2; Cultural= 3; Medicinal = 4; other please specify _____

Details on the uses of large carnivores

| **Name of large carnivore** | **Use(s)** |
| --- | --- |
| Lion |  |
| Spotted Hyena |  |
| Leopard |  |
| Striped Hyaena |  |
| Cheetah |  |
| Wild dog |  |
| Jackal |  |

1. Do you think the benefits of large carnivores to local people in this village have increased, decreased or stayed the same over the past 5 years?

Increased= 1; Decreased= 2; Stayed the same= 3 don’t know= 4

1. Why? What has changed? _______________________________________________

_______________________________________________________________________

1. How much benefit is derived from the wildlife in this area and from carnivores specifically?

|  | Large carnivores | | | Area as a whole | | |
| --- | --- | --- | --- | --- | --- | --- |
| None | Some | much | none | some | Much |
| You personally |  |  |  |  |  |  |
| Your household |  |  |  |  |  |  |
| Your village |  |  |  |  |  |  |
| The government |  |  |  |  |  |  |
| Private sector |  |  |  |  |  |  |

1. What other potential benefits related to large carnivore do you expect? _______________

_______________________________________________________________

1. **How and to what extent do the multiple enactments of Omo-Tama complex lead to conflict?**

**Grazing land and water utilization**

1. Which resource do you need most from the park (choose most important; circle 1 or 2)

Pasture= 1; cropland= 2; firewood= 3; thatch= 4; fish= 5; other please specify: _____________

1. What is the purpose of the park?

For wildlife= 1; for economic development= 2; for wildlife and people= 3; don’t know= 4; other please specify: _____________________________

1. How do you perceive about the status vegetation cover at the National Park?

Improving =1; Degrading =2; Same =3. Justify your answer (e.g. by giving examples). ______________________________________________________________________________________________________________________________

1. Who is responsible for conserving vegetation in the National Park?

Government only=1; People only =2; Government & people =3. Justify your answer. _________________________________________________________________________________________________________________________________

1. Which areas and products of the National Park do you think are allowed for use? Why? ____________________________________________________________

_____________________________________________________________

1. Do you think that your access to grazing lands for the future is secured?

Yes =1; No =2. Give reasons for your answer. _________________________________

________________________________

1. What other options do you recommend for the betterment of livestock production while conserving wildlife? _______________________________________­­­­­­­­­­­­­­­­­­­­­­­­­________

_________________________________________________________________

**Local people and large carnivore**

1. What is the status of wild carnivores at the National Park?

Increasing =1; Decreasing/Degrading =2; Same =3. Justify your answer (e.g. by giving examples). __________________________________________________________

______________________________________________________________________

1. Who is responsible for conserving wild animals in the National Park?

Government only=1; People only =2; Government & people =3. Justify your answer. _________________________________________________________________________________________________________________________

1. Why do you think predators kill livestock?

Bad animals= 1; natural behavior= 2; lack of prey = 3 are problem animals= 4; livestock too close= 5; don’t know= 6; other please specify: ________________

1. Have you lost any livestock due to large carnivore, Disease, Theft/lost or Drought in the last five years? Yes= 1; No= 2

If your answer is yes for Q11 please fill the next tables, If your answer for Q11 is no please go directly to next question.

**How much livestock have you or anyone in this household lost to:**

| **Carnivores** | **Livestock** | | | | **Buma** | Year | | | | | |
| --- | --- | --- | --- | --- | --- | --- | --- | --- | --- | --- | --- |
|  | Cattle | Shoat | Equine | Poultry | 2019 | 2020 | 2021 | 2022 | 2023 | Status |
| Lion |  |  |  |  | In |  |  |  |  |  |  |
|  |  |  |  | Out |  |  |  |  |  |  |
| Spotted hyena |  |  |  |  | In |  |  |  |  |  |  |
|  |  |  |  | Out |  |  |  |  |  |  |
| Striped hyena |  |  |  |  | In |  |  |  |  |  |  |
|  |  |  |  | Out |  |  |  |  |  |  |
| leopard |  |  |  |  | In |  |  |  |  |  |  |
|  |  |  |  | Out |  |  |  |  |  |  |
| Jackal |  |  |  |  | In |  |  |  |  |  |  |
|  |  |  |  | Out |  |  |  |  |  |  |
| Wild dog |  |  |  |  | In |  |  |  |  |  |  |
|  |  |  |  | Out |  |  |  |  |  |  |
| Cheetah |  |  |  |  | In |  |  |  |  |  |  |
|  |  |  |  | Out |  |  |  |  |  |  |

1. Has anyone in your household ever been attacked by a predator?

Yes= 1; no= 2

1. To whom do large carnivore belong to? (circle 1 or 2)

Government= 1; community= 2; no one= 3; God= 4; don’t know= 5; other please specify:

1. How do you protect your livestock from predators? (circle all applicable)

strong boma= 1; weak boma= 2; light= 3; noise= 4; child herder = 5; adult herder= 6; better herding= 7; dogs= 8; killed large carnivore indiscriminately= 9; avoided large carnivore areas= 10; other please specify: ________

1. Do you use religious or traditional practices to protect yourself and your properties from lions? (circle 1 or 2)

No= 1; yes= 2

1. If the answer is yes to Q15 which religious or traditional practices, are you using?

Amulets= 1; prayers= 2; incantations= 3; pay religious leader=4; other please specify: _______________________

1. What do you think the government should do about depredation? (circle all applicable)

build a fence= 1; compensate= 2; cull predators= 3; translocate predators= 4; build boma for me= 5; other please specify: _____________________

1. What else should be done about depredation, and by whom? _______________________

_____________________________________________________

1. Have predators been killed by people in this area? Yes = 1 no= 2

Please try to record the following information if the answer is Yes for Question 19:

| Species | Age | Sex | How many | How often | Reason and methods for killing (Retaliatory, poison, snaring, shooting etc. | what happened to the body parts? |
| --- | --- | --- | --- | --- | --- | --- |
|  |  |  |  |  |  |  |
|  |  |  |  |  |  |  |
|  |  |  |  |  |  |  |
|  |  |  |  |  |  |  |
|  |  |  |  |  |  |  |
|  |  |  |  |  |  |  |

1. Were any of your family members punished for killing wildlife/large carnivore?

Yes =1; No =2

1. What was the offence and when was the last time this happened? _____________________________________________________________________
2. Who punished and what was the punishment _________________________________
3. Over the last 5 years, the frequency of observing large carnivore: (write the answer in the table for each species)

Increased=1; decreased= 2; remained stable= 3; other please specify: ________________

_________________________________________________________

| **Large carnivore** | **Status** | **Notes** |
| --- | --- | --- |
| Lions |  |  |
| Spotted hyena |  |  |
| Leopard |  |  |
| Cheetah |  |  |
| African wild dog |  |  |
| Striped hyena |  |  |
| Jackal |  |  |

1. Over the last 5 years, the frequency of depredation events due to large carnivore has: (write the answer in the table for each species)

Increased=1; decreased= 2; remained stable= 3; other please specify: ________________

| **Large carnivore** | **Status** | **Notes** |
| --- | --- | --- |
| Lions |  |  |
| Spotted hyaena |  |  |
| Leopard |  |  |
| Cheetah |  |  |
| African wild dog |  |  |
| Striped hyaena |  |  |
| Jackal |  |  |

1. Do you want the National Park to exist? Yes =1; No =2. Justify your answer. ___________________________________________________________________

________________________________________________________

1. If your answer to Q25 is yes, how should it be managed? Why? ____________________

________________________________________________

1. If your answer to Q25 is no, how do you think is it possible to ensure the long-term availability of biodiversity to the next generations? ____________________________

___________________________________________________

1. What do you expect from the National Park Administration? ___________________

_____________________________________________

| **What is your opinion in general on the following statement:** (tick one) | disagree | Neutral | agree |
| --- | --- | --- | --- |
| The park is a good thing |  |  |  |
| I have good relations with park staff |  |  |  |
| The positive aspects of having wildlife here are more important than the negative aspects (all species) |  |  |  |
| I’m afraid of large carnivore |  |  |  |
| I feel large carnivore have the same rights as livestock to live on this land |  |  |  |
| I would be happier if there were no large carnivore |  |  |  |
| Most people in my community would want me to kill large carnivore if it killed a cow |  |  |  |
| If a family member was injured by a lion I would kill it |  |  |  |
